# Supplementary material for: Prevalence and Characterization of Salmonella Isolated from Chickens in Anhui, China
Source: MDPI journal article supplement (doi:10.3390/pathogens12030465), 2023-03-16
Supplement: s1 [file s1]

Table S1. *Salmonella* isolation results from cloacal swab samples from 50 chicken farms

| Number | Farm scale <sup>a</sup> | Breeding mode | farm type  | source area | <i>Salmonella</i> isolation results |
|--------|-------------------------|---------------|------------|-------------|-------------------------------------|
| 1      | large                   | cage          | laying hen | Dingyuan    | 0/30                                |
| 2      | medium                  | free-range    | broiler    | Hefei       | 5/30                                |
| 3      | medium                  | cage          | laying hen | Hefei       | 0/30                                |
| 4      | large                   | cage          | laying hen | Feixi       | 0/30                                |
| 5      | large                   | cage          | laying hen | Hexian      | 0/30                                |
| 6      | medium                  | cage          | laying hen | Fuyang      | 0/30                                |
| 7      | medium                  | cage          | laying hen | Fanchang    | 2/30                                |
| 8      | medium                  | cage          | laying hen | Liu'an      | 0/30                                |
| 9      | medium                  | cage          | laying hen | Hefei       | 7/30                                |
| 10     | large                   | cage          | laying hen | Hefei       | 0/30                                |
| 11     | small                   | free-range    | broiler    | Wuhu        | 5/30                                |
| 12     | large                   | cage          | laying hen | Wuhu        | 4/30                                |
| 13     | medium                  | cage          | laying hen | Wuhu        | 0/30                                |
| 14     | medium                  | cage          | laying hen | Chaohu      | 0/30                                |
| 15     | medium                  | cage          | laying hen | Guzhen      | 5/30                                |
| 16     | large                   | cage          | laying hen | Guzhen      | 0/30                                |
| 17     | large                   | cage          | laying hen | Changfeng   | 0/30                                |
| 18     | large                   | cage          | laying hen | Changfeng   | 0/30                                |
| 19     | medium                  | cage          | laying hen | Changfeng   | 0/30                                |
| 20     | small                   | free-range    | laying hen | Fengtai     | 0/30                                |
| 21     | medium                  | free-range    | broiler    | Huainan     | 0/30                                |
| 22     | large                   | cage          | laying hen | Huainan     | 3/30                                |
| 23     | large                   | cage          | broiler    | Huainan     | 0/30                                |
| 24     | medium                  | cage          | laying hen | Feidong     | 0/30                                |
| 25     | medium                  | cage          | laying hen | Feidong     | 0/30                                |
| 26     | medium                  | cage          | laying hen | Heifei      | 2/30                                |
| 27     | large                   | cage          | laying hen | Xuancheng   | 0/30                                |
| 28     | medium                  | cage          | laying hen | Xuancheng   | 0/30                                |
| 29     | medium                  | cage          | laying hen | Fuyang      | 0/30                                |
| 30     | large                   | cage          | laying hen | Fuyang      | 0/30                                |
| 31     | large                   | cage          | laying hen | Fuyang      | 2/30                                |
| 32     | medium                  | cage          | laying hen | Dingyuan    | 0/30                                |
| 33     | medium                  | cage          | laying hen | Dingyuan    | 0/30                                |
| 34     | large                   | cage          | laying hen | Wuhu        | 0/30                                |
| 35     | medium                  | cage          | laying hen | Wuhu        | 0/30                                |
| 36     | large                   | cage          | laying hen | Wuhu        | 0/30                                |
| 37     | medium                  | cage          | laying hen | Fanchang    | 0/30                                |
| 38     | medium                  | cage          | laying hen | Hanshan     | 0/30                                |
| 39     | large                   | cage          | laying hen | Hanshan     | 0/30                                |
| 40     | large                   | cage          | laying hen | Liu'an      | 0/30                                |
| 41     | medium                  | cage          | laying hen | Shouxian    | 3/30                                |

|    |        |            |            |           |      |
|----|--------|------------|------------|-----------|------|
| 42 | medium | cage       | laying hen | Huoqiu    | 0/30 |
| 43 | medium | cage       | laying hen | Liu'an    | 5/30 |
| 44 | medium | cage       | laying hen | Feidong   | 0/30 |
| 45 | medium | cage       | laying hen | Feidong   | 3/30 |
| 46 | medium | cage       | laying hen | Feixi     | 1/30 |
| 47 | small  | free-range | broiler    | Feixi     | 2/30 |
| 48 | medium | cage       | laying hen | Hefei     | 2/30 |
| 49 | large  | cage       | laying hen | Changfeng | 0/30 |
| 50 | large  | cage       | laying hen | Sixian    | 0/30 |

<sup>a</sup> Large-scale farm with a breeding scale  $\geq 20,000$  chickens, medium-scale farm with a breeding scale  $\geq 5,000$  and  $< 20,000$  chickens, small-scale farm with a breeding scale  $< 5,000$  chickens.

Table S2. Prevalence of *Salmonella* isolated from chicken in Anhui

| NO. | <i>Salmonella</i><br>isolate number | Sample type         | Breeding<br>mode | Chicken<br>type | Sample source<br>region |
|-----|-------------------------------------|---------------------|------------------|-----------------|-------------------------|
| 1   | SCF1                                | pathological tissue | cage             | laying hen      | Changfeng               |
| 2   | SHF1                                | cloacal swab        | cage             | laying hen      | Hefei                   |
| 3   | SHF2                                | cloacal swab        | cage             | laying hen      | Hefei                   |
| 4   | SFD1                                | pathological tissue | free-range       | broiler         | Feidong                 |
| 5   | SFD2                                | pathological tissue | free-range       | broiler         | Feidong                 |
| 6   | SWH1                                | cloacal swab        | cage             | laying hen      | Wuhu                    |
| 7   | SWH2                                | cloacal swab        | cage             | laying hen      | Wuhu                    |
| 8   | SWH3                                | cloacal swab        | cage             | laying hen      | Wuhu                    |
| 9   | SWH4                                | cloacal swab        | cage             | laying hen      | Wuhu                    |
| 10  | SFX1                                | pathological tissue | free-range       | broiler         | Feixi                   |
| 11  | SHF3                                | pathological tissue | cage             | laying hen      | Hefei                   |
| 12  | SCF2                                | pathological tissue | cage             | laying hen      | Changfeng               |
| 13  | SGZ1                                | pathological tissue | free-range       | broiler         | Guzhen                  |
| 14  | SAQ1                                | pathological tissue | cage             | laying hen      | Anqing                  |
| 15  | SAQ2                                | pathological tissue | cage             | laying hen      | Anqing                  |
| 16  | SHQ1                                | pathological tissue | free-range       | broiler         | Huoqiu                  |
| 17  | SHN1                                | pathological tissue | cage             | laying hen      | Huainan                 |
| 18  | SHN2                                | pathological tissue | cage             | laying hen      | Huainan                 |
| 19  | SFX2                                | pathological tissue | cage             | laying hen      | Feixi                   |
| 20  | SSX1                                | pathological tissue | cage             | laying hen      | Shouxian                |
| 21  | SHF4                                | pathological tissue | cage             | laying hen      | Hefei                   |
| 22  | SHF5                                | pathological tissue | free-range       | broiler         | Hefei                   |
| 23  | SHX1                                | pathological tissue | free-range       | broiler         | Hexian                  |
| 24  | SFD3                                | pathological tissue | free-range       | broiler         | Feidong                 |
| 25  | SFD4                                | pathological tissue | cage             | laying hen      | Feidong                 |
| 26  | SFX3                                | pathological tissue | free-range       | broiler         | Feixi                   |
| 27  | SFD5                                | cloacal swab        | cage             | laying hen      | Feidong                 |
| 28  | SFD6                                | cloacal swab        | cage             | laying hen      | Feidong                 |

|    |       |                     |            |            |           |
|----|-------|---------------------|------------|------------|-----------|
| 29 | SFD7  | cloacal swab        | cage       | laying hen | Feidong   |
| 30 | SHF6  | cloacal swab        | cage       | laying hen | Hefei     |
| 31 | SHF7  | cloacal swab        | cage       | laying hen | Hefei     |
| 32 | SHF8  | cloacal swab        | cage       | laying hen | Hefei     |
| 33 | SHF9  | cloacal swab        | cage       | laying hen | Hefei     |
| 34 | SHF10 | cloacal swab        | cage       | laying hen | Hefei     |
| 35 | SHF11 | cloacal swab        | cage       | laying hen | Hefei     |
| 36 | SHF12 | cloacal swab        | cage       | laying hen | Hefei     |
| 37 | SHF13 | pathological tissue | free-range | broiler    | Hefei     |
| 38 | SHF14 | pathological tissue | cage       | laying hen | Hefei     |
| 39 | SHF15 | pathological tissue | free-range | broiler    | Hefei     |
| 40 | SFD8  | pathological tissue | cage       | laying hen | Feidong   |
| 41 | SCF3  | pathological tissue | cage       | laying hen | Changfeng |
| 42 | SCF4  | pathological tissue | cage       | laying hen | Changfeng |
| 43 | SFD9  | pathological tissue | free-range | broiler    | Feidong   |
| 44 | SFD10 | pathological tissue | free-range | broiler    | Feidong   |
| 45 | SCH1  | pathological tissue | cage       | laying hen | Chaohu    |
| 46 | SDY1  | pathological tissue | free-range | laying hen | Dingyuan  |
| 47 | SHF16 | cloacal swab        | free-range | broiler    | Hefei     |
| 48 | SHF17 | cloacal swab        | free-range | broiler    | Hefei     |
| 49 | SHF18 | cloacal swab        | free-range | broiler    | Hefei     |
| 50 | SHF19 | cloacal swab        | free-range | broiler    | Hefei     |
| 51 | SHF20 | cloacal swab        | free-range | broiler    | Hefei     |
| 52 | SHF21 | pathological tissue | cage       | laying hen | Hefei     |
| 53 | SHF22 | pathological tissue | cage       | laying hen | Hefei     |
| 54 | SHF23 | pathological tissue | cage       | laying hen | Hefei     |
| 55 | SCF5  | pathological tissue | free-range | broiler    | Changfeng |
| 56 | SFD11 | pathological tissue | free-range | broiler    | Feidong   |
| 57 | SFC1  | pathological tissue | cage       | laying hen | Fangchang |
| 58 | SHF24 | cloacal swab        | cage       | laying hen | Hefei     |
| 59 | SHF25 | cloacal swab        | cage       | laying hen | Hefei     |
| 60 | SHF26 | pathological tissue | free-range | broiler    | Hefei     |
| 61 | SLA1  | pathological tissue | cage       | laying hen | Liu'an    |
| 62 | SFY1  | pathological tissue | cage       | laying hen | Fuyang    |
| 63 | SCF6  | pathological tissue | cage       | laying hen | Changfeng |
| 64 | SLA2  | pathological tissue | cage       | laying hen | Liu'an    |
| 65 | SCF7  | pathological tissue | free-range | broiler    | Changfeng |
| 66 | SCH2  | pathological tissue | cage       | laying hen | Chaohu    |
| 67 | SHF27 | pathological tissue | cage       | laying hen | Hefei     |
| 68 | SCH3  | pathological tissue | cage       | laying hen | Chaohu    |
| 69 | SCH4  | pathological tissue | cage       | laying hen | Chaohu    |
| 70 | SCH5  | pathological tissue | cage       | laying hen | Chaohu    |
| 71 | SFC2  | cloacal swab        | cage       | laying hen | Fangchang |
| 72 | SFC3  | cloacal swab        | cage       | laying hen | Fangchang |

|     |       |                     |            |            |          |
|-----|-------|---------------------|------------|------------|----------|
| 73  | SSX2  | cloacal swab        | cage       | laying hen | Shouxian |
| 74  | SSX3  | cloacal swab        | cage       | laying hen | Shouxian |
| 75  | SSX4  | cloacal swab        | cage       | laying hen | Shouxian |
| 76  | SLA3  | pathological tissue | cage       | laying hen | Liu'an   |
| 77  | SLA4  | pathological tissue | cage       | laying hen | Liu'an   |
| 78  | SLA5  | pathological tissue | cage       | laying hen | Liu'an   |
| 79  | SLA6  | cloacal swab        | cage       | laying hen | Liu'an   |
| 80  | SLA7  | cloacal swab        | cage       | laying hen | Liu'an   |
| 81  | SLA8  | cloacal swab        | cage       | laying hen | Liu'an   |
| 82  | SLA9  | cloacal swab        | cage       | laying hen | Liu'an   |
| 83  | SLA10 | cloacal swab        | cage       | laying hen | Liu'an   |
| 84  | SHQ2  | pathological tissue | cage       | laying hen | Huoqiu   |
| 85  | SHQ3  | pathological tissue | free-range | broiler    | Huoqiu   |
| 86  | SHN3  | cloacal swab        | cage       | laying hen | Huainan  |
| 87  | SHN4  | cloacal swab        | cage       | laying hen | Huainan  |
| 88  | SHN5  | cloacal swab        | cage       | laying hen | Huainan  |
| 89  | SHN6  | pathological tissue | free-range | broiler    | Huainan  |
| 90  | SHN7  | pathological tissue | free-range | broiler    | Huainan  |
| 91  | SGZ2  | cloacal swab        | cage       | laying hen | Guzhen   |
| 92  | SGZ3  | cloacal swab        | cage       | laying hen | Guzhen   |
| 93  | SGZ4  | cloacal swab        | cage       | laying hen | Guzhen   |
| 94  | SGZ5  | cloacal swab        | cage       | laying hen | Guzhen   |
| 95  | SGZ6  | cloacal swab        | cage       | laying hen | Guzhen   |
| 96  | SFY2  | cloacal swab        | cage       | laying hen | Fuyang   |
| 97  | SFY3  | cloacal swab        | cage       | laying hen | Fuyang   |
| 98  | SFX4  | cloacal swab        | cage       | laying hen | Feixi    |
| 99  | SFX5  | pathological tissue | cage       | laying hen | Feixi    |
| 100 | SFX6  | pathological tissue | cage       | laying hen | Feixi    |
| 101 | SFX7  | pathological tissue | free-range | broiler    | Feixi    |
| 102 | SFX8  | cloacal swab        | cage       | laying hen | Feixi    |
| 103 | SFX9  | cloacal swab        | cage       | laying hen | Feixi    |
| 104 | SWH5  | cloacal swab        | free-range | broiler    | Wuhu     |
| 105 | SWH6  | cloacal swab        | free-range | broiler    | Wuhu     |
| 106 | SWH7  | cloacal swab        | free-range | broiler    | Wuhu     |
| 107 | SWH8  | cloacal swab        | free-range | broiler    | Wuhu     |
| 108 | SWH9  | cloacal swab        | free-range | broiler    | Wuhu     |

Table S3. Antimicrobials resistance spectrum of the isolates

| No.of<br>antibacte<br>rials | Drug resistant spectrum                                      | No.of<br>Strains | Drug<br>resistance<br>rate/% |
|-----------------------------|--------------------------------------------------------------|------------------|------------------------------|
| 0                           |                                                              | 20               | 18.52                        |
| 1                           | TMP                                                          | 2                | 1.85                         |
| 1                           | LEV                                                          | 1                | 0.93                         |
| 1                           | TMP                                                          | 5                | 4.63                         |
| 1                           | AZM                                                          | 2                | 1.85                         |
| 1                           | FUR                                                          | 14               | 12.93                        |
| 2                           | AMP+ FUR                                                     | 1                | 0.93                         |
| 2                           | AMP+TMP                                                      | 1                | 0.93                         |
| 3                           | AMP+TET+DOX                                                  | 11               | 10.19                        |
|                             | AMP+STX+TMP                                                  | 4                | 3.70                         |
| 4                           | AMP+STX+TMP+ FUR                                             | 2                | 1.85                         |
|                             | AMP+TET+DOX+ AZT                                             | 1                | 0.93                         |
|                             | AMP+TET+DOX+ FUR                                             | 1                | 0.93                         |
|                             | AMP+TET+DOX+ TMP                                             | 1                | 0.93                         |
|                             | AMP+AMC+TET+DOX                                              | 2                | 1.85                         |
| 6                           | AMP+ CRO +CN+TET+STX+ AZT                                    | 3                | 2.78                         |
| 7                           | AMP+ CTX+ TET + DOX +CHL+FLO+ TMP                            | 2                | 1.85                         |
|                             | AMP+ CRO +CN+TET+ DOX+STX+ AZT                               | 3                | 2.78                         |
| 8                           | AMP+ CTX+ TET+DOX +CHL+FLO+ STX+TMP                          | 1                | 0.93                         |
|                             | AMP+ CRO +CN+NEO+TET+ DOX+STX+ AZT                           | 1                | 0.93                         |
|                             | AMP+ CRO +CTX+CN+AMK+CHL+FLO+ AZT                            | 2                | 1.85                         |
|                             | AMP+AMC+ CRO +CN+ TET+DOX+ STX+ AZT                          | 2                | 1.85                         |
| 11                          | AMP+AMC+ CRO+ CTX+CN+ CHL+FLO+ STX<br>+TMP+AZM+ AZT          | 2<br>1           | 1.85<br>0.93                 |
|                             | AMP+ CEN+NEO+ TET + DOX +CIP+NOR+<br>CHL+FLO+STX +TMP        | 3<br>2           | 2.78<br>1.85                 |
|                             | AMP+ CRO+ CTX+CN+ CEN+ TET + DOX+ STX<br>+TMP+AZM+ AZT       |                  |                              |
|                             | AMP+ CRO+ CTX+CN+ TET + DOX+ CHL+FLO+STX<br>+TMP+ AZT        |                  |                              |
| 12                          | AMP+AMC+ CRO+ CTX+CN+ TET+DOX+TMP+<br>CHL+FLO+STX +TMP+ AZT  | 9<br>1           | 8.33<br>0.93                 |
|                             | AMP+AMC+ CRO+ CTX+CN+ CEN+ TET + DOX+ STX<br>+TMP+AZM+ AZT   |                  |                              |
| 13                          | AMP+AMC+ CRO+ CTX+CN+ CEN+ TET+DOX+LEV+<br>STX +TMP+AZM+ AZT | 2                | 1.85                         |
|                             | AMP+AMC+ CRO+ CTX+CN+ TET+DOX+<br>CHL+FLO+STX +TMP+ FUR+ AZT | 1                | 0.93                         |
| 18                          | AMP+AMC+ CRO+ CTX+CN+ CEN+                                   |                  |                              |

|    |                                             |   |      |
|----|---------------------------------------------|---|------|
|    | TET+DOX+CIP+ENR+LEV+NOR+ STX +TMP+ FOS+ AZT | 1 | 0.93 |
| 19 | AMP+AMC+ CRO+ CTX+CN+                       |   |      |
|    | GEN+AMK+NEO+DOX+CIP+ENR+LEV + NOR+          | 1 | 0.93 |
|    | CHL+FLO+ STX +TMP+ AZM+ FOS + AZT           |   |      |
|    | AMP+AMC+ CRO+ CTX+CN+ GEN+NEO+              | 2 | 1.85 |
|    | TET+DOX+CIP+ LEV+NOR+ CHL+FLO+STX+ TMP+     |   |      |
|    | AZM+ FOS + AZT                              |   |      |
| 20 | AMP+AMC+ CRO+ CTX+CN+ GEN+AMK+ NEO+         |   |      |
|    | TET+DOX+CIP+ ENR+LEV+NOR+ CHL+ FLO+ STX     | 1 | 0.93 |
|    | +TMP+ FUR+ AZT                              |   |      |
